# Supplementary material
Source: Springer Nature journal article supplement (https://www.springermedizin.de/resource/supplementary/13046_2010_297_MOESM4_ESM.pdf/9662062)

**P38MAPK**

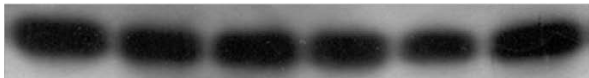

**P-P38MAPK**

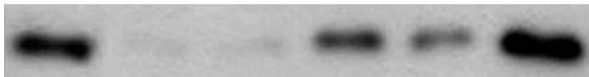

**caspase-3**

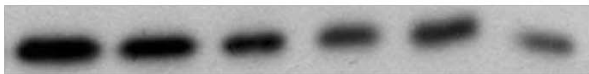

**1**

**2**

**3**

**4**

**5**

**6**

Supplement: MOESM4 [file 9662062]
